# Supplementary material for: Measurement report: Aerosol and cloud nuclei properties along the Central and Northern Great Barrier Reef – impact of continental emissions
Source: Copernicus journal article supplement (doi:10.5194/acp-25-10075-2025), 2025-09-09
Supplement: Supplementary file 1 [file acp-25-10075-2025-supplement.pdf]

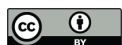

*Supplement of*

**Measurement report: Aerosol and cloud nuclei properties along the Central and Northern Great Barrier Reef – impact of continental emissions**

**E. Johanna Horchler et al.**

*Correspondence to:* E. Johanna Horchler (eva.horchler@qut.edu.au)

The copyright of individual parts of the supplement might differ from the article licence.

## **S1. Details on the instrumental set-up and data analysis**

Particle number concentration ( $> 7$  nm) and size distribution were obtained using a Mixing Condensation Particle Counter (mCPC 1720, Brechtel Manufacturing Inc.), a Scanning Electrical Mobility Spectrometer (SEMS 2100, Brechtel Manufacturing Inc.) combined with a mCPC 1720, and an Aerodynamic Particle Sizer (APS 3321, TSI Inc.). The SEMS was operated at a sheath flow rate of  $5 \text{ L min}^{-1}$  and set to scan 150 aerosol diameter bins from 5 to 1081 nm, in both up and down scanning modes, with a 5-minute scan time. The APS captured size distributions from 0.5 to 5  $\mu\text{m}$ , with a time resolution of 2 minutes. The APS data was exported with Stokes correction turned on and an assumed density of  $1.3 \text{ g cm}^{-3}$ . The density was chosen under the assumption that the particles are composed of sea salt and an inlet relative

humidity of approximately 50 %. APS measurements for particle diameters less than 700 nm were removed due to known measurement biases at these diameters (Beddows et al., 2010). APS aerodynamic diameters were converted to the volume equivalent diameter (DeCarlo et al., 2004). The particle density required for the conversion was modelled as a function of relative humidity using E-AIM (Wexler and Clegg, 2002) and an assumed particle composition of NaCl with  $1.3 \text{ g cm}^{-3}$  at 50 % RH. The APS and SEMS diameters were further corrected for the relative humidity dependent growth factor (GF), which is computed taking the measured RH by the SEMS, and assuming a composition of ammonium sulfate for the SEMS and sea salt for the APS based on the size-dependent chemical composition typically observed in marine sea spray aerosols (Heintzenberg et al., 2000). In the absence of RH data, an RH of 48 % was estimated as the average value across the entire period. The APS and SEMS data were corrected for size-dependent inlet losses (Fig. S1), combined into a single size distribution ranging from 5 nm to 5000 nm and re-binned onto a 32-channel per decade set of particle diameters. Overlapping bins were averaged. Due to instrument artifacts, concentrations for particles smaller than 10 nm were not reliable and thus were not considered.

The CCN-100 measured the total CCN number concentration at a range of supersaturations (0.1 %, 0.2 %, 0.3 %, 0.5 %, 0.7 % for 10 minutes each). The data are processed to remove the first 150 seconds of data at supersaturations 0.2 to 0.7 % and 300 seconds at 0.1 %

44 supersaturation to ensure that the supersaturation has stabilised in the instrument. The  $\kappa$ -Köhler  
45 model was used to determine the hygroscopicity parameter for the background aerosol (Petters  
46 and Kreidenweis, 2007). Therefore, the critical diameter for cloud droplet activation was  
47 determined by integrating the size distribution, from the largest diameter to the diameter at  
48 which the integration is equal to the measured CCN number concentration at the measured  
49 supersaturation. For this calculation, a size-independent homogeneous aerosol composition and  
50 internal particle mixing were assumed. This is presumably only valid for background aerosols,  
51 while in most cases aerosols of different size have different composition and are not necessarily  
52 internally mixed. The uncertainties associated with this method could result in an incorrect  
53 estimation of the critical diameter ( $D_{\text{crit}}$ ) and thus also of the required SS for CCN activation.  
54 The measured CCN was taken as the average of the CCN measured during the averaging period  
55 for the size distribution. The measurement uncertainty in the computed critical diameter was  
56 computed as a sum of the standard deviation in the mean of the CCN number concentrations  
57 and the relative uncertainty in the size distribution. The size distribution uncertainty was  
58 assumed to be equal to the standard deviation in the mean of the CPC concentrations over the  
59 averaging period, which assumes that the uncertainty in the distribution is not dependent on  
60 particle diameter. The hygroscopicity parameter was then computed for the above calculated  
61 critical diameter (Petters and Kreidenweis, 2007). The Hoppel Minimum, which is formed due  
62 to the in-cloud growth of aerosol, was calculated as the global minimum between 30 nm and

63 150 nm if present. The corresponding effective maximum in-cloud supersaturation at the  
64 Hoppel minimum can be approximated via  $\kappa$ -Köhler theory using the hygroscopicity  
65 parameter  $\kappa$  (Gong et al., 2023).

66

67 The time zone was set to UTC time for all measurements. The times were adjusted for time  
68 delays between the individual instruments. For comparison reasons, all instruments, except the  
69 SEMS were averaged onto the same timescale of one hour unless stated otherwise.

70

71 NOAA's Hybrid-Single-Particle Lagrangian Integrated Trajectory (HYSPLIT) dispersion  
72 model (Stein et al., 2015) was used to calculate back trajectories, representing the path taken  
73 by each air mass during the three days prior to reaching the ship. Because air masses that passed  
74 over land within three days before reaching the ship showed a clear land signature, but  
75 associated HYSPLIT back-trajectory errors are proportional to 15 to 30 % of the trajectory  
76 travel distance (Draxler and Rolph, 2007), the back-trajectory duration was thus limited to three  
77 days. The dispersion model was underpinned by meteorological data obtained from the Global  
78 Data Assimilation System (GDAS) dataset at  $1^\circ$  spatial resolution. To ensure that the trajectory  
79 starting height is representative of the air mass pathways, starting heights of 0.5 of the planetary  
80 boundary layer (PBL) height, and 10 m above mean sea level, which corresponds to the  
81 sampling inlet height, were evaluated. Because both approaches yield similar trajectories, a

starting height of 10 m above sea level was chosen to account for the actual sampling height and allow for greater variations in the vertical dimension within the PBL. This is required for the calculation of HYSPLIT ensemble trajectories, which apply small spatial perturbations based on user-defined grid offsets to the end point prior to estimating the trajectories. In this study for each hour of sampling, an ensemble of 27 trajectories was generated. Each ensemble was then averaged to give a trajectory that best represented the path taken by the air mass. To identify periods that may have been influenced by continental emissions, continental boundaries were sourced from the ArcGIS Hub (Esri, 2021). Any air masses that passed over land within three days of reaching the ship were classified as “continental”.

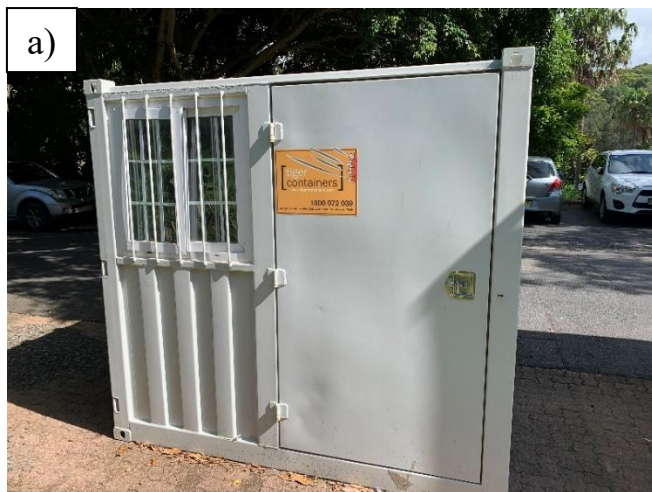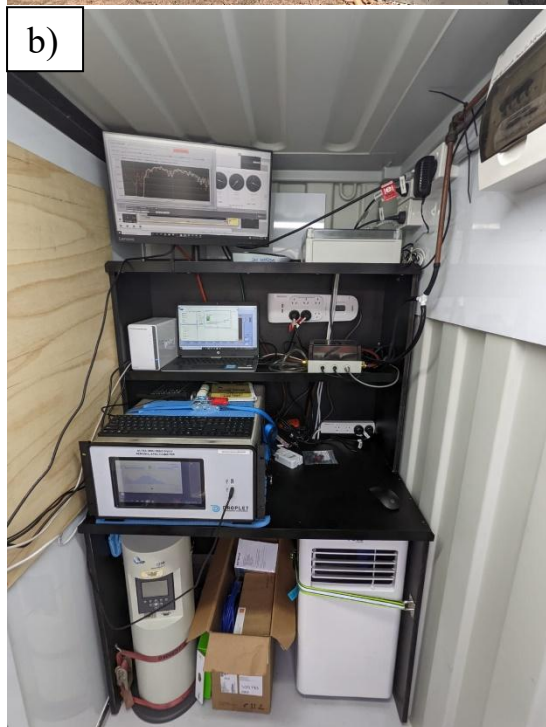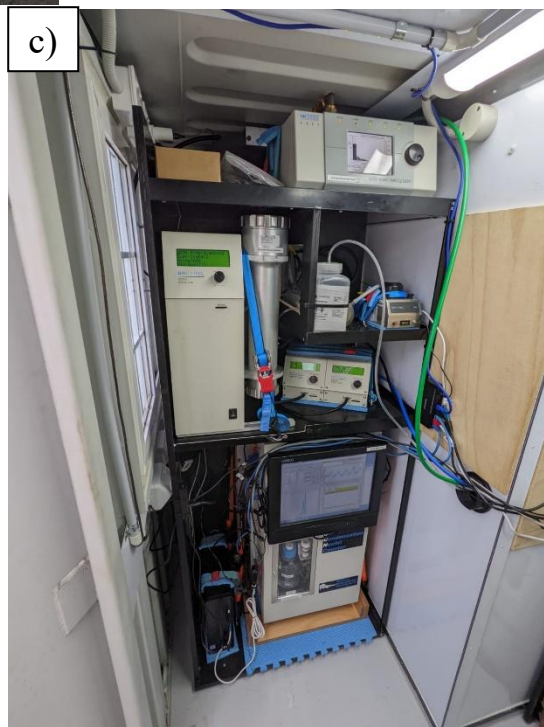

108

109 **Figure S1:** (a) Exterior of the Cloud-Cube (b) data logging, inlet control systems, UHSAS,  
 110 filter sampler, airconditioner (c) APS, SEMS, TAP, CPC's and CCNc.

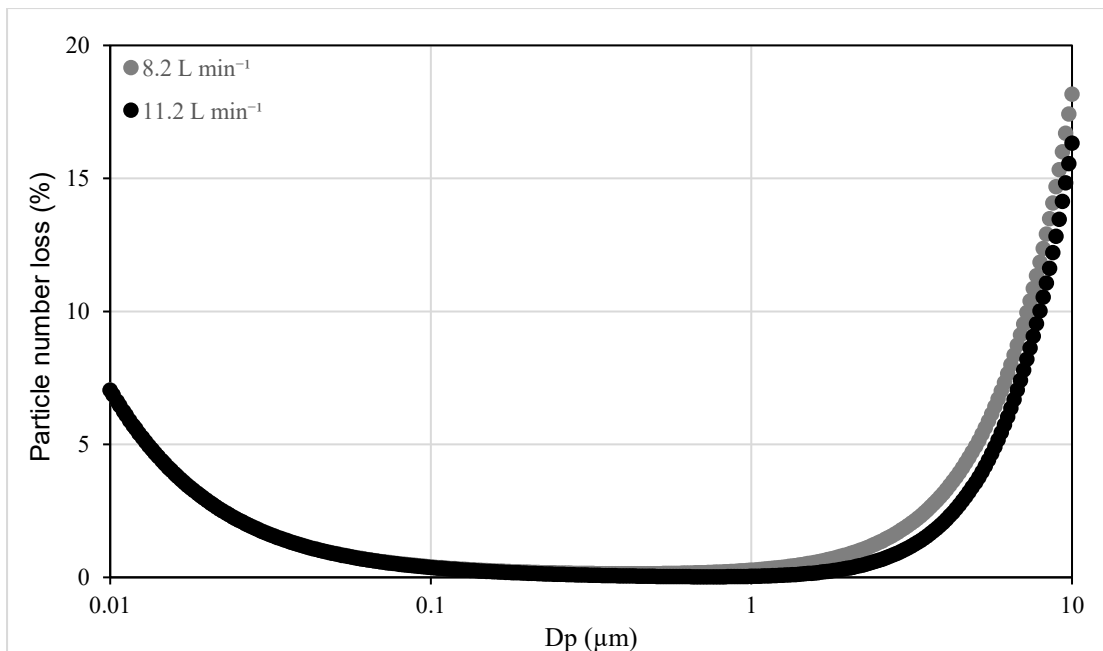

**Figure S2:** Particle number loss as a function of diameter for the aerosol sampling equipment during the Atmospheric Survey in February and March 2022 as modelled using the Particle Loss Calculator. All instruments running together made up a total flow rate of 11.2 L min<sup>-1</sup>. In the case where the filter sampler was not running, the total flow rate was 8.2 L min<sup>-1</sup>. The corresponding particle loss correction was applied for each flow rate, even though differences in the particle losses are only significant for supermicron particles.



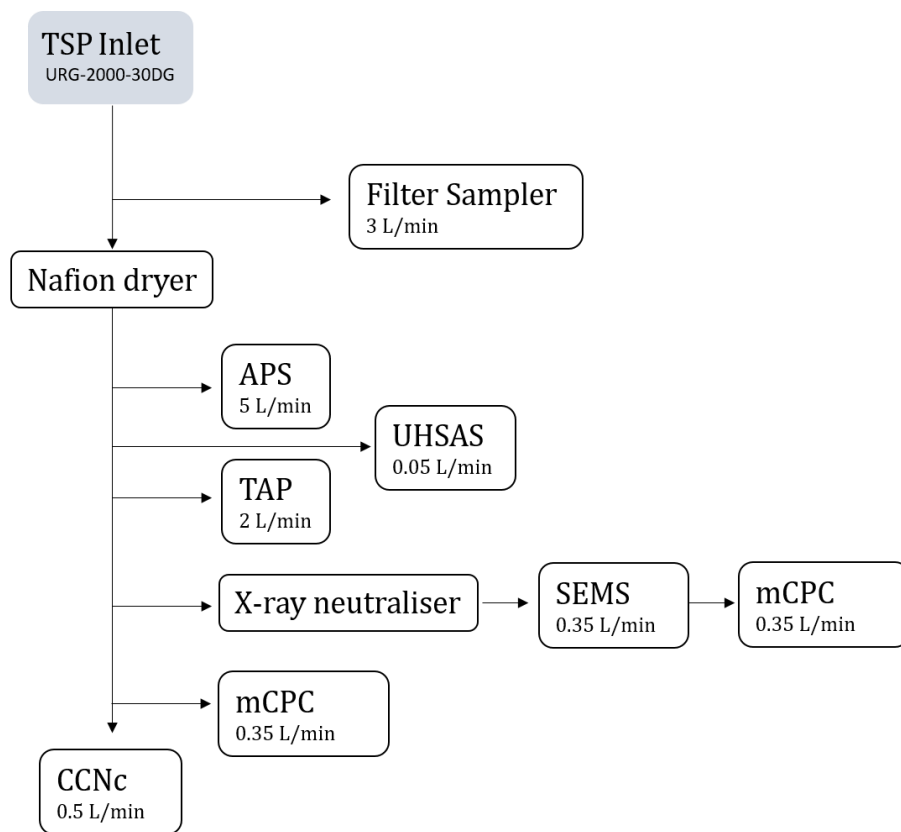

118

119 **Figure S3:** Schematic of the set-up. Arrows indicate the flow directions.

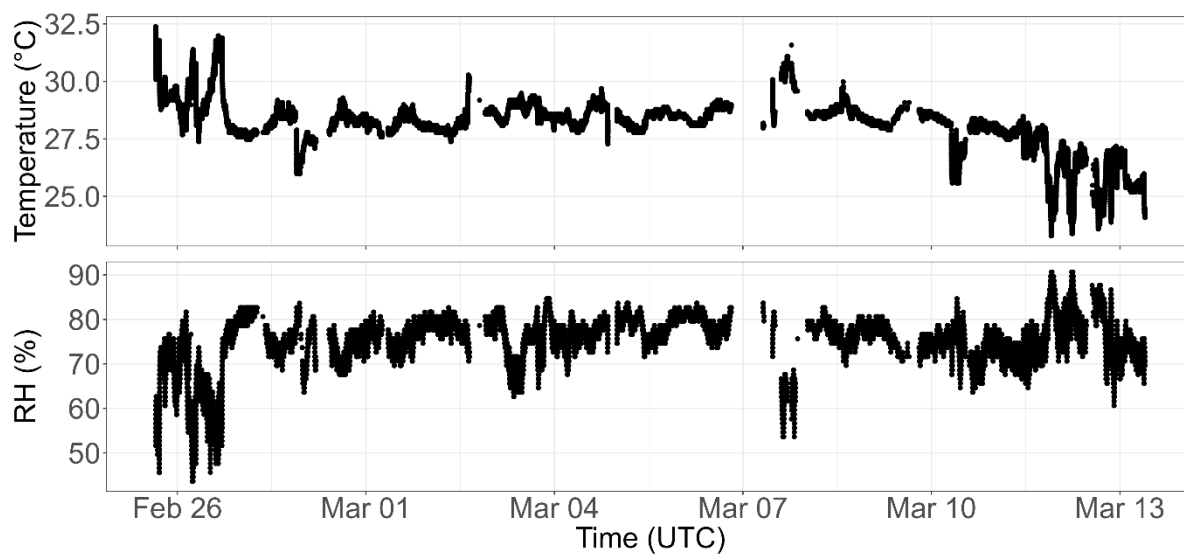

**Figure S4:** Time series of the temperature and RH.

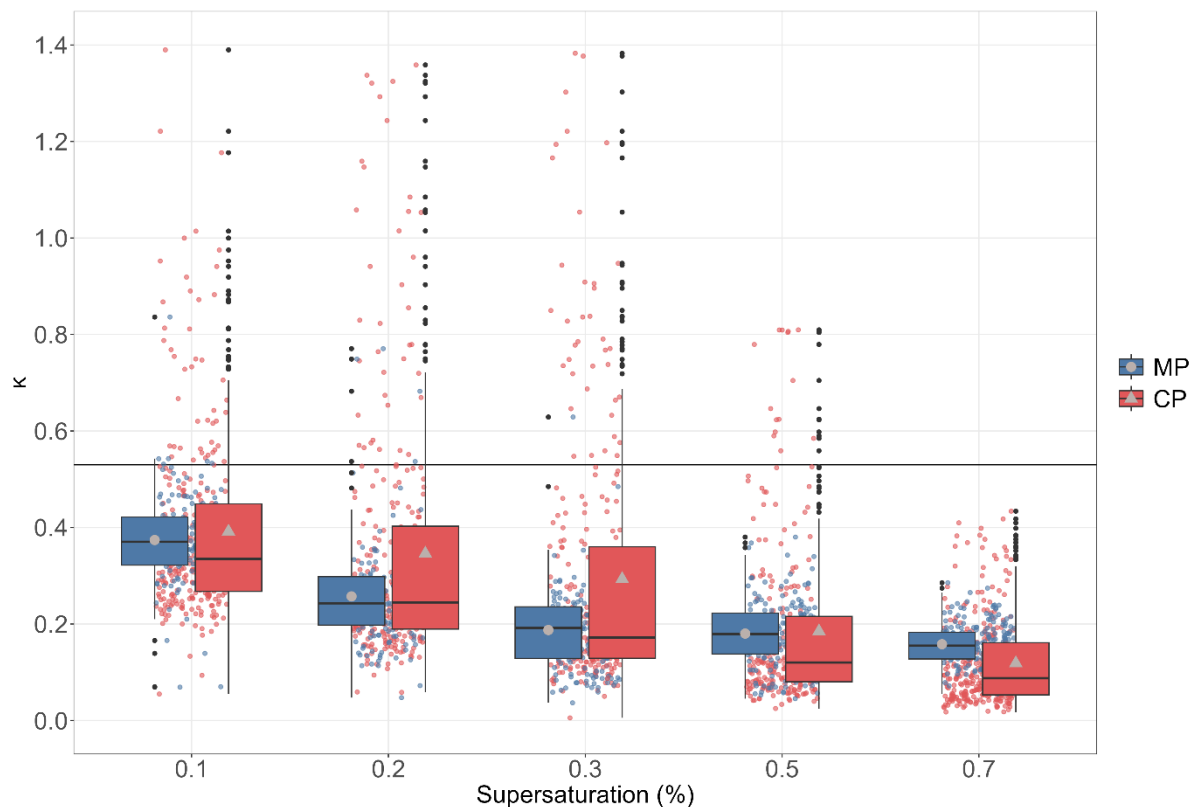

**Figure S5:** Aerosol hygroscopicity parameters  $\kappa$  for the MP (blue) and CP (red) averaged on a minute timeframe at different supersaturations. The black horizontal line at 0.53 indicates the hygroscopicity parameter  $\kappa$  for pure ammonium sulfate (Petters and Kreidenweis, 2007). The black horizontal line in a box displays the median of the individual data. The lower and upper hinges represent the 25<sup>th</sup> and 75<sup>th</sup> percentiles. The upper and lower whiskers extend from the hinge to the largest or smallest measured values, respectively, but not more than 1.5 times the difference between the 25<sup>th</sup> and 75<sup>th</sup> percentiles. The mean is shown as grey points for the MP and grey triangles for the CP. Outliers are individual data points that fall outside of this range and are color-coded black.

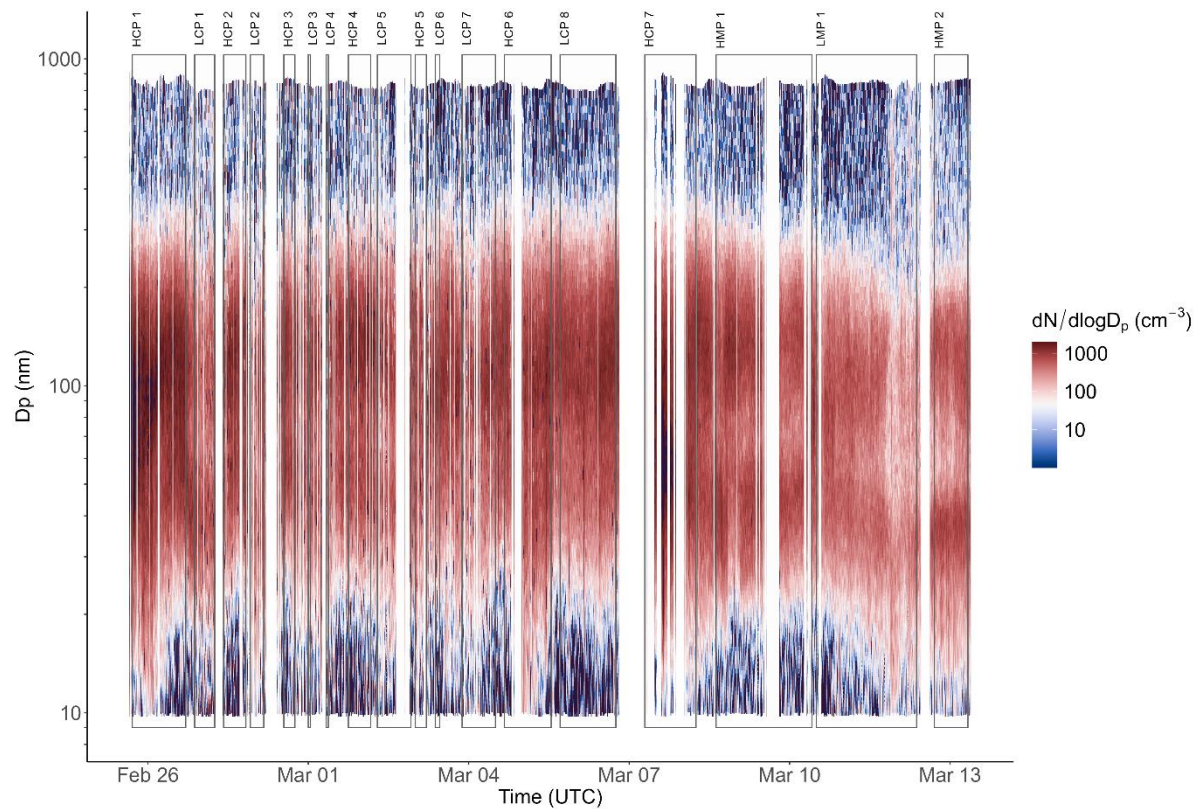

**Figure S6:** Aerosol number size distribution for the entire measurement period. The boxes represent periods where values deviate more than 10% from the median of the CN concentration. Periods with values more than 10% higher than the median are labelled high continental period (HCP 1-7) or high marine period (HMP 1-2), those with values more than 10% lower than the median low continental period (LCP 1-8) or low marine period (LMP 1).

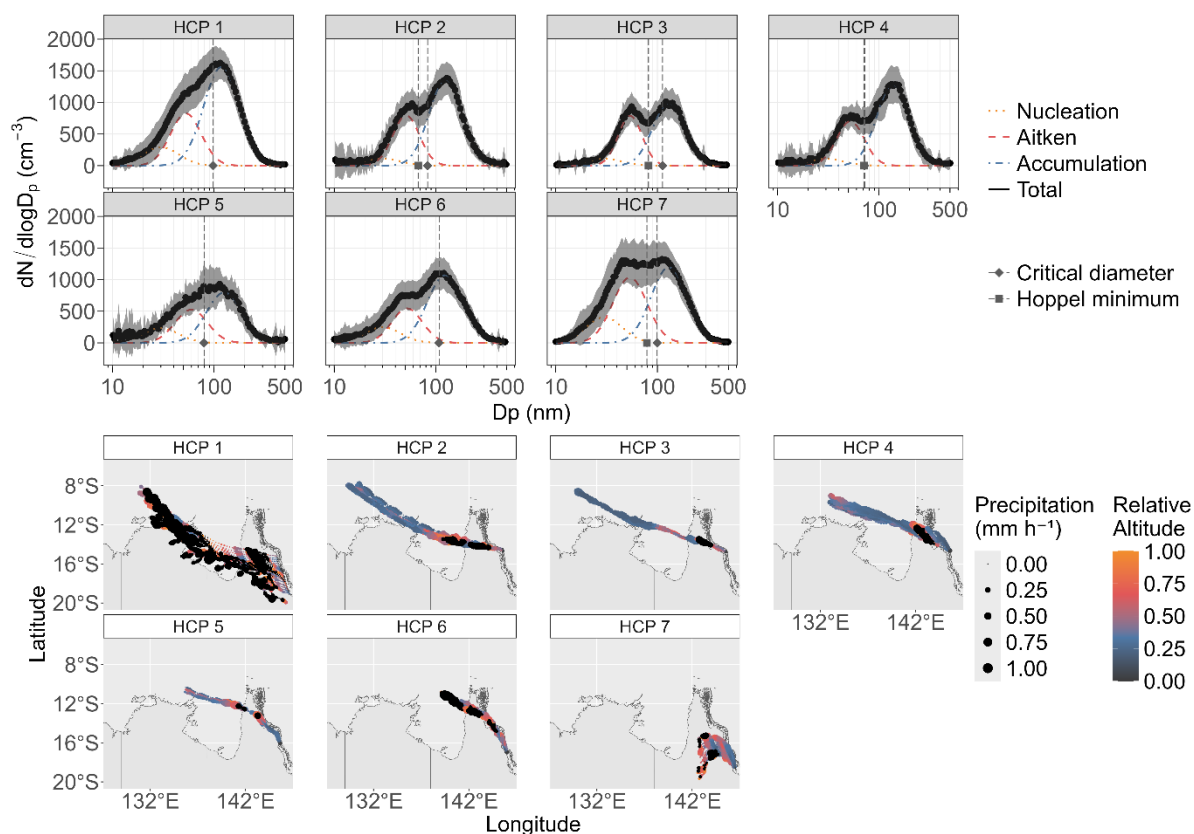

139

140 **Figure S7:** Average aerosol number size distributions (top) and the three-day back-trajectories  
 141 (bottom) for the seven continental high CN number concentration periods (HCP1-7). The lines  
 142 in the size distribution plots represent lognormal fits for the nucleation mode (dotted orange),  
 143 Aitken mode (dashed red), accumulation mode (dot-dashed blue), and total (solid black). The  
 144 dashed grey vertical line at the diamond-shaped point represents the critical diameter ( $D_{\text{crit}}$ ),  
 145 whereas the dashed grey vertical line at the square-shaped point represents the Hoppel  
 146 minimum. Back-trajectories are coloured by their altitude in respect to the planetary boundary  
 147 layer height. Black data points represent air masses travelling through the free troposphere. The  
 148 precipitation amount determines the size of the trajectory points. The ship location marks the  
 149 start point of each trajectory. The GBR was provided in the gisaimsr package by the Geoscience

150 Australia (GA) and the Great Barrier Reef Marine Park Authority (GBRMPA). The continental  
 151 boundaries were obtained from the ozmaps package (doi:10.32614/CRAN.package.ozmaps).  
 152  
 153  
 154

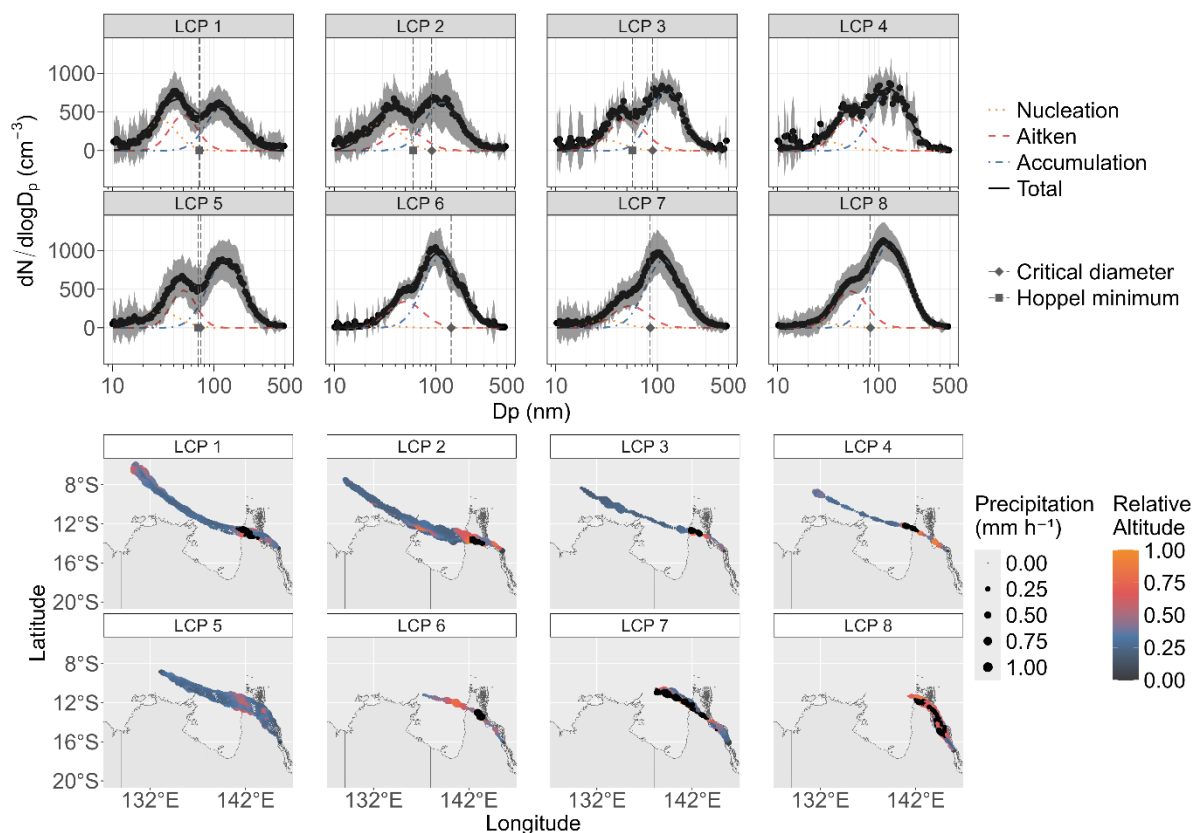

155  
 156 **Figure S8:** Average aerosol number size distributions (top) and the three-day back-trajectories  
 157 (bottom) for the eight continental low CN number concentration periods (LCP1-8). The lines  
 158 in the size distribution plots represent lognormal fits for the nucleation mode (dotted orange),  
 159 Aitken mode (dashed red), accumulation mode (dot-dashed blue), and total (solid black). The  
 160 dashed grey vertical line at the diamond-shaped point represents the critical diameter ( $D_{\text{crit}}$ ),

161 whereas the dashed grey vertical line at the square-shaped point represents the Hoppel  
162 minimum. No CCN data for 0.3% SS were available during LCP4. Back-trajectories are  
163 coloured by their altitude in respect to the planetary boundary layer height. Black data points  
164 represent air masses travelling through the free troposphere. The precipitation amount  
165 determines the size of the trajectory points. The ship location marks the start point of each  
166 trajectory. The GBR was provided in the gisaimsr package by the Geoscience Australia (GA)  
167 and the Great Barrier Reef Marine Park Authority (GBRMPA). The continental boundaries  
168 were obtained from the ozmaps package (doi:10.32614/CRAN.package.ozmaps).

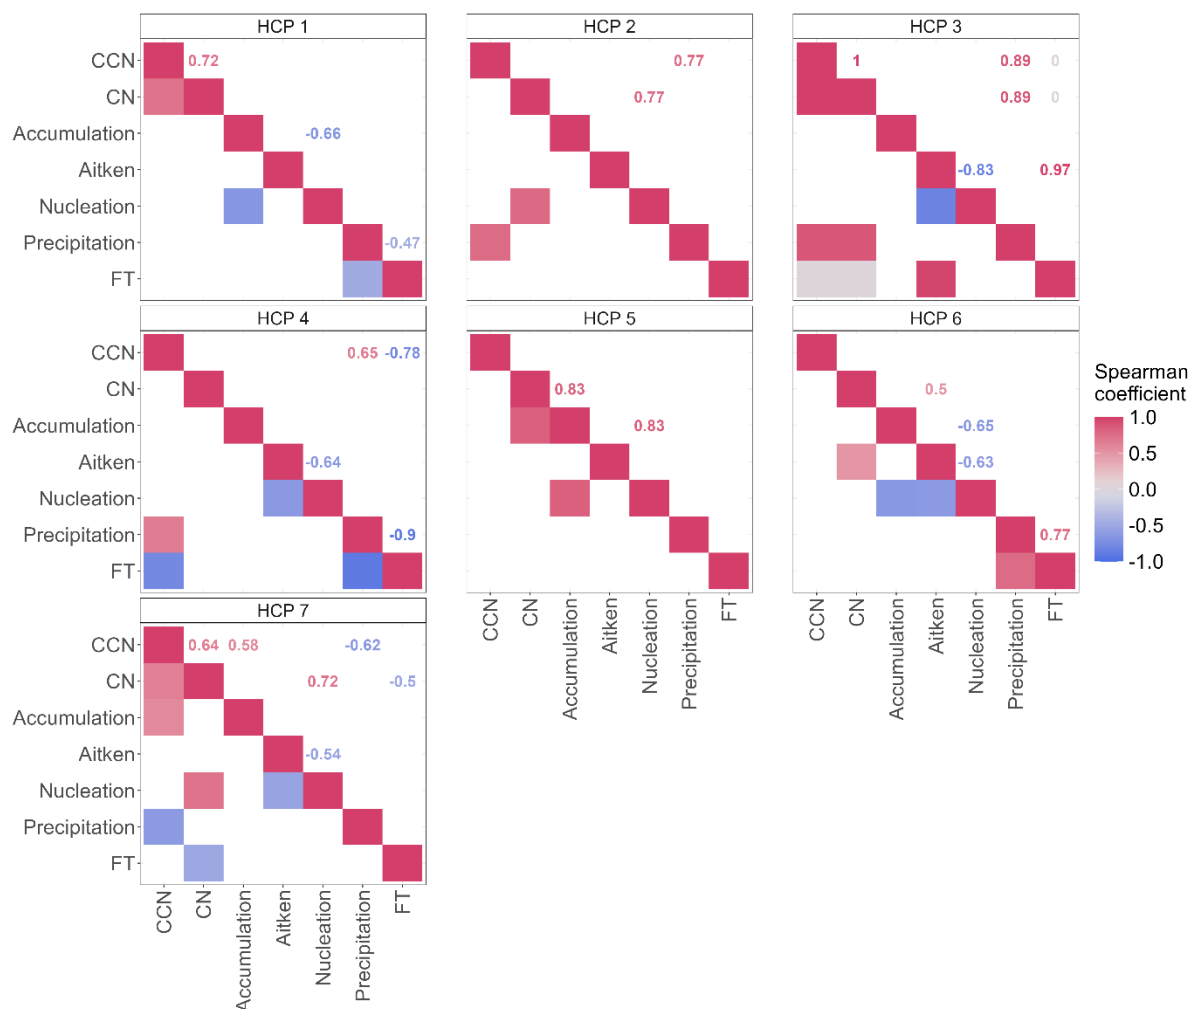

**Figure S9:** Spearman correlation coefficient ( $p < 0.05$ ) between CCN number concentration, CN number concentration inferred from the total fit, number concentration in the accumulation mode, number concentration in the Aitken mode, number concentration in the nucleation mode, averaged precipitation along one trajectory, and the percentage of time the trajectory spent in the FT for the seven continental high CN number concentration periods (HCP1-7).



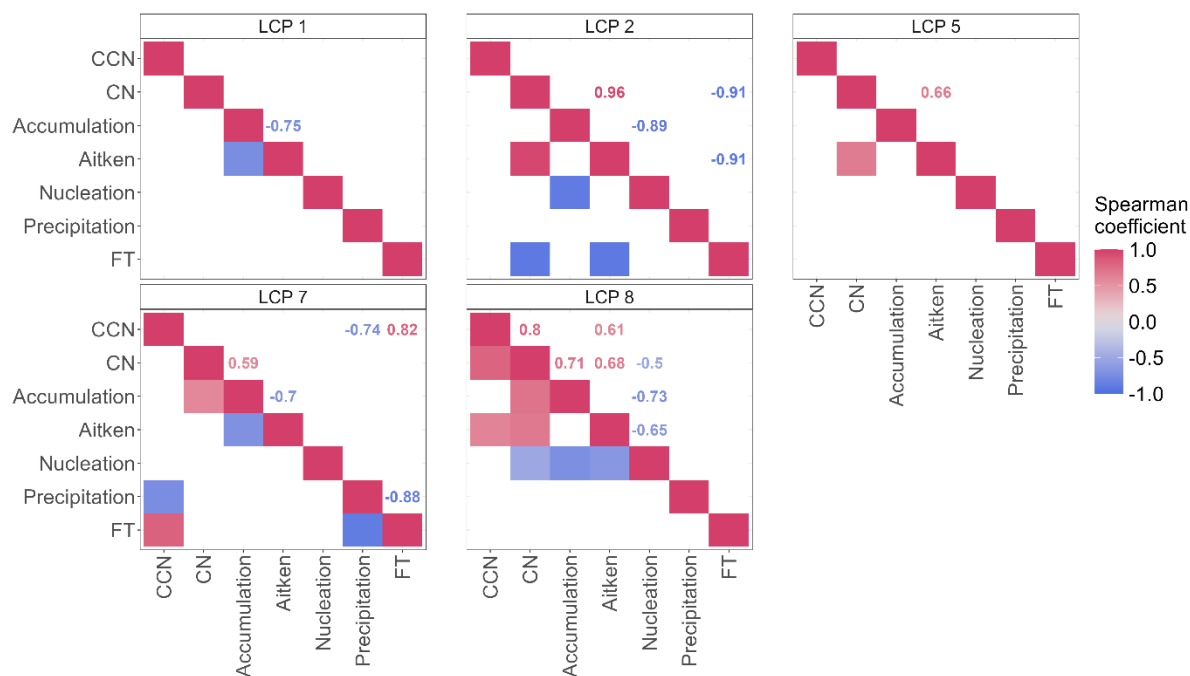

**Figure S10:** Spearman correlation coefficient ( $p < 0.05$ ) between CCN number concentration, CN number concentration inferred from the total fit, number concentration in the accumulation mode, number concentration in the Aitken mode, number concentration in the nucleation mode, averaged precipitation along one trajectory, and the percentage of time the trajectory spent in the FT for five continental low CN number concentration periods (LCP1-2, LCP5, LCP7-8). LCP3-4, and LCP6 do not include enough data points to perform a correlation analysis.

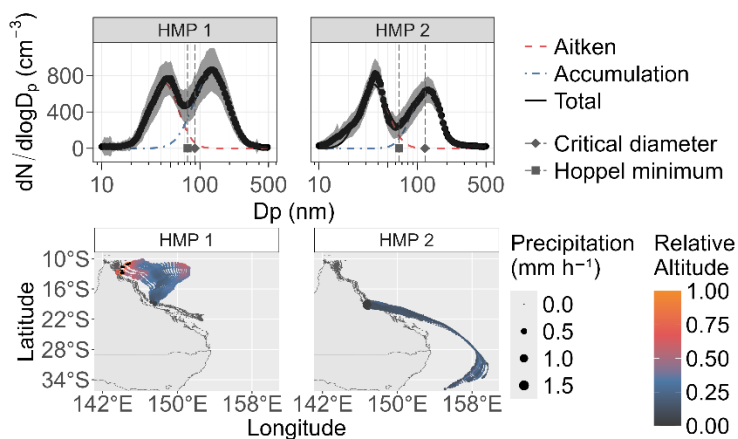

182

183 **Figure S11:** Average aerosol number size distributions (top) and the three-day back-  
 184 trajectories (bottom) for the two marine high CN number concentration periods (HMP1-2). The  
 185 lines in the size distribution plots represent lognormal fits for the nucleation mode (dotted  
 186 orange), Aitken mode (dashed red), accumulation mode (dot-dashed blue), and total (solid  
 187 black). The dashed grey vertical line at the diamond-shaped point represents the critical  
 188 diameter ( $D_{\text{crit}}$ ), whereas the dashed grey vertical line at the square-shaped point represents the  
 189 Hoppel minimum. Back-trajectories are coloured by their altitude in respect to the planetary  
 190 boundary layer height. Black data points represent air masses travelling through the free  
 191 troposphere. The precipitation amount determines the size of the trajectory points. The ship  
 192 location marks the start point of each trajectory. The GBR was provided in the gisaimsr package  
 193 by the Geoscience Australia (GA) and the Great Barrier Reef Marine Park Authority  
 194 (GBRMPA). The continental boundaries were obtained from the ozmaps package  
 195 (doi:10.32614/CRAN.package.ozmaps).

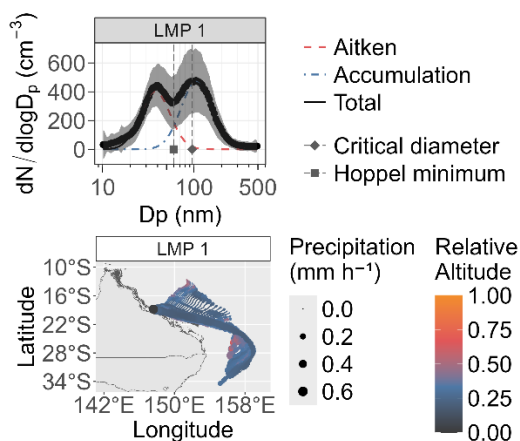

**Figure S12:** Average aerosol number size distributions (top) and the three-day back-trajectories (bottom) for the marine low CN number concentration periods (LMP1). The lines in the size distribution plots represent lognormal fits for the nucleation mode (dotted orange), Aitken mode (dashed red), accumulation mode (dot-dashed blue), and total (solid black). The dashed grey vertical line at the diamond-shaped point represents the critical diameter ( $D_{crit}$ ), whereas the dashed grey vertical line at the square-shaped point represents the Hoppel minimum. Back-trajectories are coloured by their altitude in respect to the planetary boundary layer height. Black data points represent air masses travelling through the free troposphere. The precipitation amount determines the size of the trajectory points. The ship location marks the start point of each trajectory. The GBR was provided in the gisaims package by the Geoscience Australia (GA) and the Great Barrier Reef Marine Park Authority (GBRMPA). The continental boundaries were obtained from the ozmaps package (doi:10.32614/CRAN.package.ozmaps).

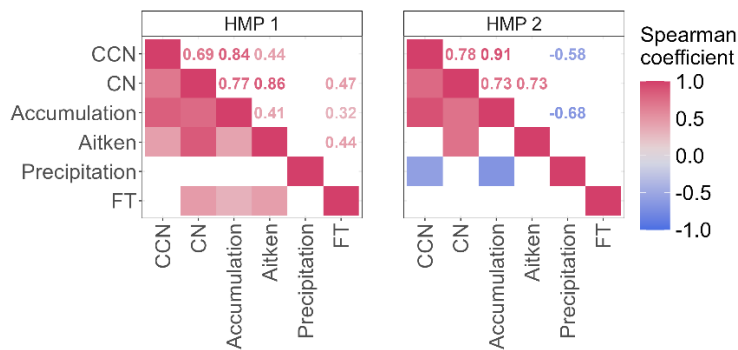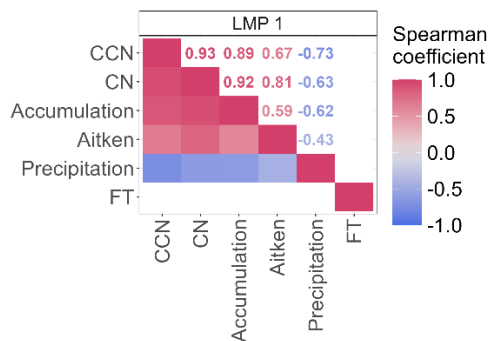

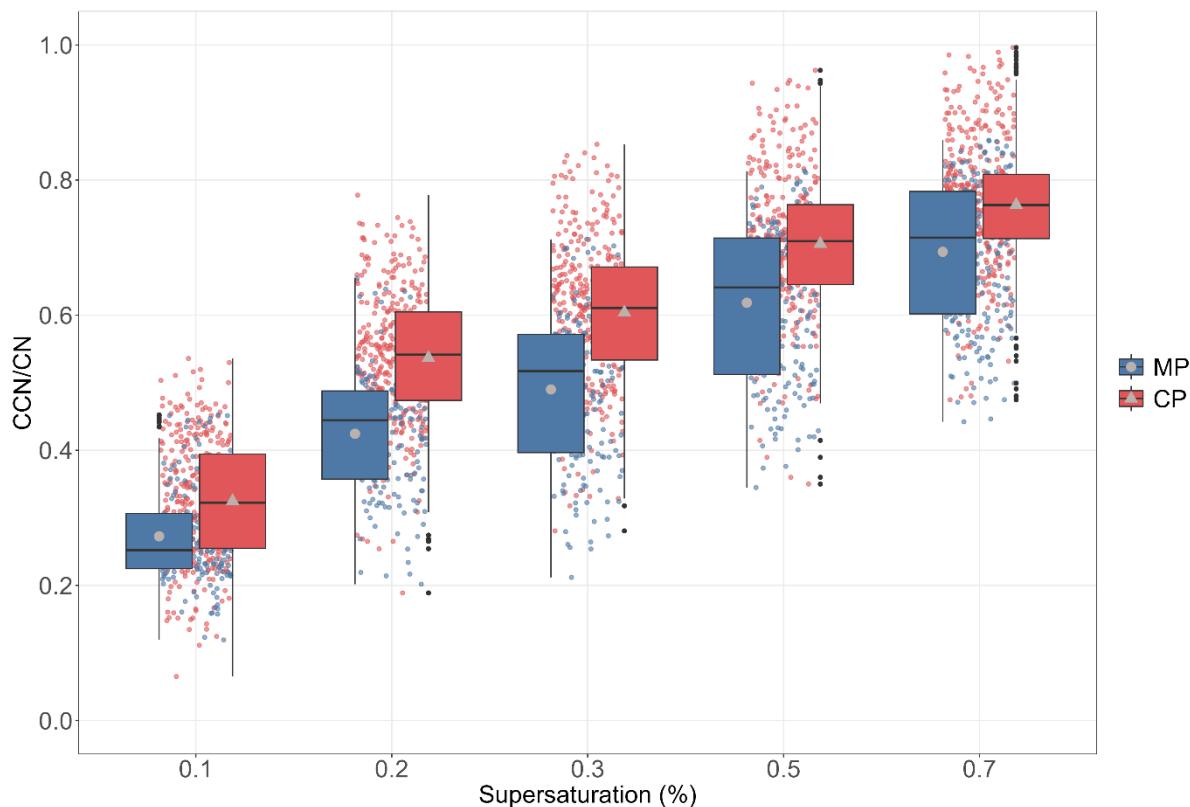

**Figure S15:** CCN activation ratios  $CCN/CN$  for the MP (blue) and CP (red) averaged on a minute timeframe at different supersaturations. The black horizontal line in a box displays the median of the individual data. The lower and upper hinges represent the 25<sup>th</sup> and 75<sup>th</sup> percentiles. The upper and lower whiskers extend from the hinge to the largest or smallest measured values, respectively, but not more than 1.5 times the difference between the 25<sup>th</sup> and 75<sup>th</sup> percentiles. The mean is shown as grey points for the MP and grey triangles for the CP. Outliers are individual data points that fall outside of this range and are color-coded black.

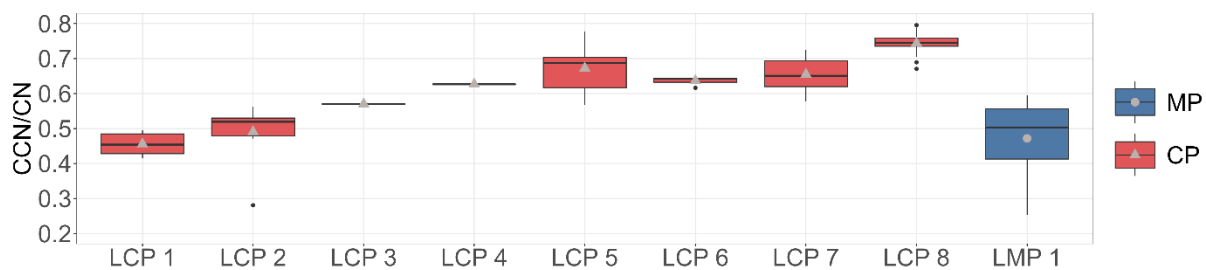

**Figure S16:** CCN activation ratios (CCN/CN) at 0.3 % SS for the MP (blue) and the CP (red) for the low CN number concentration periods (LCP1-8 and LMP1). The black horizontal line in a box displays the median of the individual data. The lower and upper hinges represent the 25<sup>th</sup> and 75<sup>th</sup> percentiles. The upper and lower whiskers extend from the hinge to the largest or smallest measured values, respectively, but not more than 1.5 times the difference between the 25<sup>th</sup> and 75<sup>th</sup> percentiles. The mean is shown as grey points for the MP and grey triangles for the CP. Outliers are individual data points that fall outside of this range and are color-coded black.

250 **Table S1:** Critical diameter ( $D_{\text{crit}}$ ) and Hoppel minimum

|      | Critical diameter ( $D_{\text{crit}}$ ) (nm) | Hoppel minimum (nm) |
|------|----------------------------------------------|---------------------|
| CP   | 99.00                                        | (66.1)              |
| MP   | 96.00                                        | 68.3                |
| HCP1 | 97.79                                        | /                   |
| HCP2 | 83.24                                        | 67.1                |
| HCP3 | 112.43                                       | 81.8                |
| HCP4 | 72.21                                        | 71.1                |
| HCP5 | 79.75                                        | /                   |
| HCP6 | 107.89                                       | /                   |
| HCP7 | 99.33                                        | 78.8                |
| LCP1 | 72.45                                        | 71.7                |
| LCP2 | 91.47                                        | 60.0                |
| LCP3 | 89.73                                        | 56.6                |
| LCP4 | /                                            | /                   |
| LCP5 | 73.76                                        | 69.6                |
| LCP6 | 141.95                                       | /                   |
| LCP7 | 85.04                                        | /                   |
| LCP8 | 82.01                                        | /                   |
| HMP1 | 89.01                                        | 74.9                |
| HMP2 | 119.82                                       | 65.3                |
| LMP1 | 94.50                                        | 59.8                |

251

## 252 References

- 253 1 Beddows, D. C. S., Dall'Osto, M., and Harrison, R. M.: An Enhanced Procedure for the  
254 Merging of Atmospheric Particle Size Distribution Data Measured Using Electrical  
255 Mobility and Time-of-Flight Analysers, *Aerosol Sci. Technol.*, 44:11, 930-938,  
256 doi:10.1080/02786826.2010.502159, 2010.
- 257 2 Conrad, B. M. and Johnson, M. R.: Mass absorption cross-section of flare-generated black  
258 carbon: Variability, predictive model, and implications. *Carbon*, 149, 760-771,  
259 doi:10.1016/j.carbon.2019.04.086, 2019.
- 260 3 DeCarlo, P. F., Slowik, J. G., Worsnop, D. R., Davidovits, P., and Jimenez, J. L.: Particle  
261 Morphology and Density Characterization by Combined Mobility and Aerodynamic  
262 Diameter Measurements. Part 1: Theory, *Aerosol Sci. Technol.*, 38, 1185–1205,  
263 doi:10.1080/027868290903907, 2004.
- 264 4 Draxler, R. R., and Rolph, G. D.: HYbrid Single-Particle Lagrangian Integrated Trajectory  
265 Model, In: National Air Quality Conference, NOAA Air Resource Laboratory,  
266 [https://www.arl.noaa.gov/documents/workshop/NAQC2007/HTML\\_Docs/index.html](https://www.arl.noaa.gov/documents/workshop/NAQC2007/HTML_Docs/index.html),  
267 2007.
- 268 5 Gong, X., Wang, Y., Xie, H., Zhang, J., Lu, Z., Wood, R., Stratmann, F., Wex, H., Liu, X.,  
269 and Wang, J.: Maximum supersaturation in the marine boundary layer clouds over the  
270 North Atlantic, *AGU Advances*, 4, e2022AV000855, doi:10.1029/2022AV000855, 2023.



- 271 6 Heintzenberg, J., Covert, D., and Van Dingenen, R.: Size distribution and chemical  
272 composition of marine aerosols: a compilation and review, *Tellus B: Chem. Phys.*  
273 *Meteorol.*, 52, 1104–1122, doi:10.3402/tellusb.v52i4.17090, 2000.
- 274 7 Laing, J. R., Jaffe, D. A., and Sedlacek III, A. J.: Comparison of Filter-based Absorption  
275 Measurements of Biomass Burning Aerosol and Background Aerosol at the Mt. Bachelor  
276 Observatory. *Aerosol Air Qual. Res.*, 20, 663–678, doi:10.4209/aaqr.2019.06.0928, 2020.
- 277 8 Petters, M. D., and Kreidenweis, S. M.: A single parameter representation of hygroscopic  
278 growth and cloud condensation nucleus activity, *Atmos. Chem. Phys.*, 7, 1961–1971,  
279 doi:10.5194/acp-7-1961-2007, 2007.
- 280 9 Stein, A. F., Draxler, R. R., Rolph, G. D., Stunder, B. J., Cohen, M. D., and Ngan, F.:  
281 NOAA's HYSPLIT Atmospheric Transport and Dispersion Modeling System, *B. Am.*  
282 *Meteorol. Soc.*, 96, 2059–2077, doi:10.1175/bams-d-14-00110.1, 2015.
- 283 10 Wexler, A. S. and Clegg, S. L.: Atmospheric aerosol models for systems including the ions  
284  $\text{H}^+$ ,  $\text{NH}_4^+$ ,  $\text{Na}^+$ ,  $\text{SO}_4^{2-}$ ,  $\text{NO}_3^-$ ,  $\text{Cl}^-$ ,  $\text{Br}^-$ , and  $\text{H}_2\text{O}$ , *J. Geophys. Res.*, 107(D14), 4207,  
285 doi:10.1029/2001JD000451, 2002.
